# Supplementary material
Source: MDPI journal article supplement (https://www.mdpi.com/2073-4395/9/10/609)
Supplement: s1 [file s1]

**Substitution of inorganic nitrogen fertilizer with green manure (GM) increased yield stability by improving C input and nitrogen recovery efficiency in rice based cropping system**

Muhammad Qaswar<sup>a</sup>, Huang Jing<sup>a,b</sup>, Waqas Ahmed<sup>a</sup>, Liu Shujun<sup>a,b</sup>, Li Dongchu<sup>a,b</sup>, Zhang Lu<sup>a,b</sup>, Liu lisheng<sup>a,b</sup>, Xu Yongmei<sup>c</sup>, Han Tianfu<sup>a</sup>, Du Jiangxue<sup>a</sup>, Gao Jusheng<sup>a,b,\*</sup>, Zhang Huimin<sup>a,b,d\*</sup>

<sup>a</sup> National Engineering Laboratory for Improving Quality of Arable Land; Institute of Agricultural Resources and Regional Planning, Chinese Academy of Agricultural Sciences, Beijing 100081, China

<sup>b</sup> National Observation Station of Qiyang Agri-ecology System; Institute of Agricultural Resources and Regional Planning, Chinese Academy of Agricultural Sciences, Qiyang, Hunan 426182, China

<sup>c</sup> Institute of Soil, Fertilizer and Agricultural Water Conservation, Xinjiang Academy of Agricultural Sciences, Urumqi 830091, China

<sup>d</sup> College of Agriculture, Henan University of Science and Technology, Luoyang 471000, China

\*Corresponding Author

Zhang Huimin

zhanghuimin@caas.cn

Gao Jusheng

[gaojusheng@caas.cn](mailto:gaojusheng@caas.cn)

Muhammad Qaswar and Huang Jing equally contributed for this research

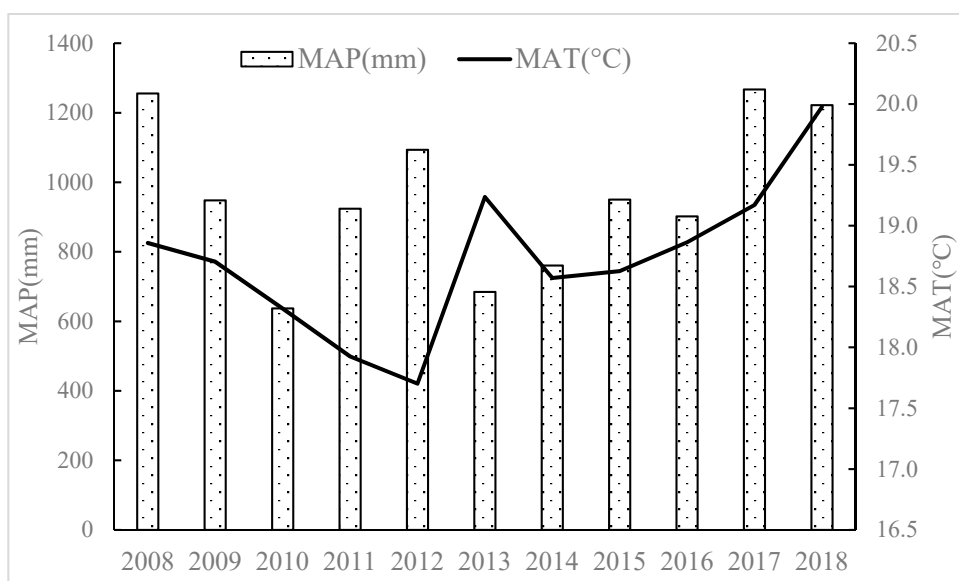

Figure S1. Mean annual temperature (MAT) and mean annual precipitation (MAP) from 2008 to 2018

Figure S2

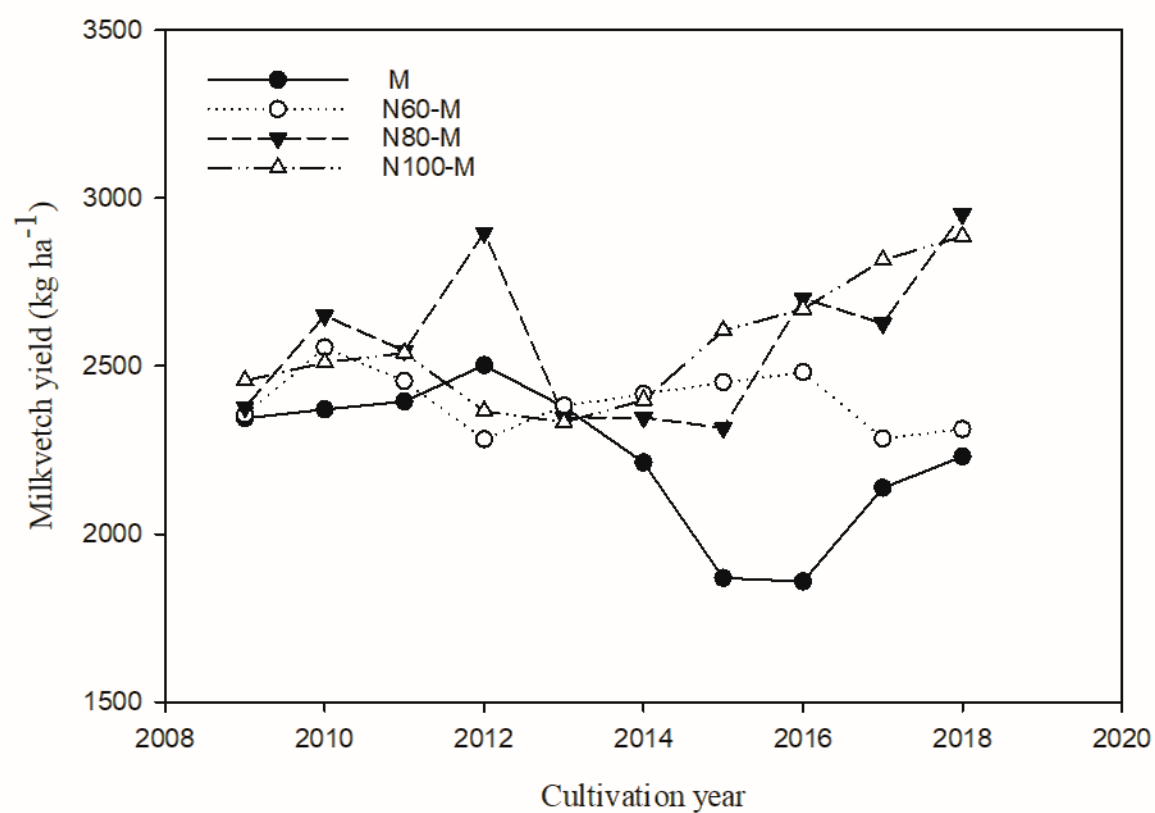

Figure S2. Milkvetch yield (dry weigh) kg ha<sup>-1</sup> during long-term experiment from 2009 to 2018.

Table S1. The name of cultivars of rice sown in this experiment from 2009 to 2018

| Year      | Early rice       | Late rice      |
|-----------|------------------|----------------|
| 2009-2012 | Jinyou 974       | Jinyou 207     |
| 2013-2017 | Lingliangyou 942 | T You 207      |
| 2018      | Yiliangyou 4156  | Lingyouhuazhan |
